# Supplementary material for: An Integrated Biochemical, Proteomics, and Metabolomics Approach for Supporting Medicinal Value of Panax ginseng Fruits
Source: Front Plant Sci. 2016 Jul 4;7:994. doi: 10.3389/fpls.2016.00994 (PMC4930952; doi:10.3389/fpls.2016.00994)
Supplement: Supplementary file 2 [file Table_2.XLSX]

## Sheet: Sheet1
Table 2. List of the ginseng fruit proteins identified using LC-MS/MS.
Spot No.	Protein	Score	Coverage	Mw/ pI(T)	Sequence (XCorr)
3	Mitochondrial lipoamide dehydrogenase 1	95.95	23.53	55.9 / 7.38	ALLHSSHMYHEAK / EAAMATYDKPIHI / VVSSTGALSLPDIPK / VGKFPLLANSR / VVSVDTSGDGVK / VVSSTGALSLPDIPKK / TIDDAEGLVK / HSFANHGVK / TPFTAGLGLDK / KVVSSTGALSLPDIPK / NIIIATGSDVK / FPLLANSR / TSGVEYR / ILPGVTIDEK (3.83 / 3.48 / 3.22 / 3.19 / 3.16 / 2.95 / 2.64 / 2.59 / 2.59 / 2.51 / 2.39 / 2.30 / 2.17 / 2.17)
6	Stress-inducible protein, putative	142.63	39.09	69.8 / 6.52	GNAAFSAGNYTDAVR / REPEPMPEEIEVSEEK / AGLSDAQSAAATR / LQAHSPEDMEMPDVQPER / GDLSPEELKER / LGALPEGLKDAEK / KRPAEEDQPVK / TVELKPDWSK / NPSNLNLYLK / KGAAQFLMK / AAVYLEMGK / EKEAGNAAYKK / RPAEEDQPVKEK / NQELLDGVRR / GLEIDPNNEALK / YTEALSDAK / GDLSPEELK / KGLEIDPNNEALK / LISSGIVQIK / LGALPEGLK / ASQEHMK / RNPNDHK / EAGNAAYK / NQELLDGVR / ALETYQEGLK / DYEPAIETFQK / LTSDPSTR / GAAQFLMK / NPLVMNK (4.23 / 3…
7	Cobalamin-independent synthase family protein	107.63	23.83	80.3 / 6.14	DLEAHQLEAFTK / YGAGIGPGVYDIHSPR / KYAEVNPALK / KISEEEYVTAIK / GNASVPAMEMTK / RATNVSAR / ISEEEYVTAIK / VNNEAVQK / GITGFGFDLVR / IPSTEEIADR / FLFAGVVDGR / SWLAFAAQK / AVTEYNEAK / DEVEDLEK / SLEGIVGK / VVEVNALAK / AGITVIQIDEAALR / YAEVNPALK / FSYASHK (4.58 / 4.18 / 3.63 / 3.63 / 3.16 / 2.96 / 2.91 / 2.83 / 2.71 / 2.80 / 2.61 / 2.36 / 2.36 / 2.32 / 2.25 / 2.20 / 2.20 / 2.15 / 2.08)
8	Phosphoglucomutase/phosphomannomutase family protein	105.63	34.1	66.2 / 6.44	SNAEHEPPEFGGAADGDADR / VDTAPIDGQKPGTSGLR / YNMENGGPAPEGITDK / LQSSLGEVNNVIK / RIFVEELGAK / GATLVVSGDGR / YDYENVDAGAAK / SMPTSAALDVVAK / LSGTGSEGATIR / EDFGGGHPDPNLTYAK / ERVGADGSK / LVTVEDIVR / FFEVPTGWK / SIFDFQSIQK / IFVEELGAK / SDVSNVANADEFEYK / MQEFTGR / DAIQIIIK (5.59 / 4.99 / 3.86 / 3.64 / 3.63 / 3.35 / 3.17 / 3.06 / 3.01 / 2.82 / 2.39 / 2.37 / 2.20 / 2.17 / 2.14 / 2.11 / 2.09 / 2.02)
9	Cobalamin-independent synthase family protein	97.71	18.62	84.5 / 6.09	YGAGIGPGVYDIHSPR / KYAEVNPALK / KISEEEYVK / RATNVSAR / VNNEAVQK / AGITVIQIDEAALR / YLFAGVVDGR / IPSTEEIADR / GVTAFGFDLVR / DEVEDLEK / VVEVDALAK / YAEVNPALK / ISEEEYVK / SWLAFAAQK (4.21 / 3.55 / 3.36 / 2.95 / 2.94 / 2.74 / 2.71 / 2.69 / 2.52 / 2.40 / 2.22 / 2.21 / 2.18 / 2.06)
10	Cobalamin-independent synthase family protein	54.29	18.62	84.5 / 6.09	YGAGIGPGVYDIHSPR / RATNVSAR / VNNEAVQK / IPSTEEIADR / KYAEVNPALK / YLFAGVVDGR / DEVEDLEK / GVTAFGFDLVR / AGITVIQIDEAALR / KISEEEYVK / VVEVDALAK / YAEVNPALK / ISEEEYVK / SWLAFAAQK (4.28 / 3.03 / 2.86 / 2.70 / 2.57 / 2.56 / 2.36 / 2.36 / 2.35 / 2.33 / 2.23 / 2.22 / 2.12 / 2.04)
11	ATPase, F1 complex, alpha subunit protein	33.76	28.88	20.3 / 7.99	TAIAIDTILNQK / VVDALGVPIDGR / KSVHEPMQTGLK / SVHEPMQTGLK / AVDSLVPIGR / GALSDHER (3.47 / 3.32 / 3.04 / 2.84 / 2.81 / 2.12)
12	Translation elongation factor EF1B, gamma chain	24.74	17.25	48.6 / 5.96	NPLDLLPPSK / AVEVGEEEEAPKPKPK / KPAETKEPAKPK / MLVIGSEPPYK / ALIAAEYSGVK / YNDENTVSFVTLNK (3.42 / 3.25 / 2.99 / 2.56 / 2.40 / 2.38)
13	6-phosphogluconate dehydrogenase family protein	53.93	26.7	48.7 / 5.72	AGGVGDILIDQTVDK / AGGVGDILIDQTVDKK / ERLPANLVQAQR / DYFGAHTYER / LPANLVQAQR / AGAPVDQTIK / VAAAEVFK / NIEDILLK / NADLANLLVDPEFAK / VIIMLVK / NGPSLMPGGSFEAYK / TLSVYLEK / FLSGLKDER (4.33 / 4.00 / 3.47 / 2.79 / 2.67 / 2.57 / 2.48 / 2.43 / 2.21 / 2.16 / 2.11 / 2.09 / 2.02)
15	Enolase	85.99	33.04	49.2 / 5.85	AVGNVNTIIGPALIGK / VQIVGDDLLVTNPK / KYGQDATNVGDEGGFAPNIQENK / AGASVLNIPLYK / MGVEVYHNLK / HIANLAGNK / HIANLAGNKK / VNQIGSVTESIEAVK / RAGWGVMASHR / DGGSDYLGK / YGQDATNVGDEGGFAPNIQENK / AGWGVMASHR / EGLELLK / MTAEIGEK / EENNNGSQK / TYDLNFK (4.07 / 3.77 / 3.52 / 3.46 / 3.22 / 3.15 / 3.11 / 3.08 / 3.07 / 2.76 / 2.45 / 2.25 / 2.22 / 2.16 / 2.14 / 2.04)
16	Enolase	114.45	43.33	49.2 / 5.85	KYGQDATNVGDEGGFAPNIQENK / AVGNVNTIIGPALIGK / TYDLNFKEENNNGSQK / RAGWGVMASHR / VQIVGDDLLVTNPK / AGASVLNIPLYK / LVLPVPAFNVINGGSHAGNK / MGVEVYHNLK / HIANLAGNK / HIANLAGNKK / VNQIGSVTESIEAVK / YGQDATNVGDEGGFAPNIQENK / DGGSDYLGK / AGWGVMASHR / AAVPSGASTGIYEALELR / EGLELLK / TYDLNFK / IEEELGSEAVYAGANFR (4.97 / 4.19 / 3.70 / 3.57 / 3.47 / 3.40 / 3.33 / 3.28 / 3.24 / 3.18 / 3.01 / 2.95 / 2.59 / 2.48 / 2.…
18	Enolase	104.59	24.29	49.2 / 5.85	AVGNVNTIIGPALIGK / VQIVGDDLLVTNPK / MGVEVYHNLK / AGASVLNIPLYK / VNQIGSVTESIEAVK / RAGWGVMASHR / HIANLAGNK / HIANLAGNKK / DGGSDYLGK / AGWGVMASHR / EGLELLK / TYDLNFK (4.20 / 3.78 / 3.47 / 3.43 / 3.28 / 3.23 / 3.16 / 3.15 / 2.70 / 2.52 / 2.16 / 2.09)
32	Heat shock protein 81.4	94.51	25.63	63.9/ 5.4	GIVDSEDLPLNISR / TNNTLTIVDSGIGMTK / DGQSDIYYITGESK / SGDEMTSLKDYVTR / KAVENSPFLER / ADLVNNLGTIAR / EGLKLEESEDEK / EVSHEWSLVNK / RAPFDLFDTR / EDQLEYLEER / AVENSPFLER / DGQSDIYYITGESKK / DTSGEVLGR / IRFESLTDK (3.89 / 3.42 / 3.32 / 3.12 / 3.1 / 2.9 / 2.67 / 2.58 / 2.55 / 2.54 / 2.43 / 2.25 / 2.19 / 2.11)
33	Heat shock protein 81.4	85.11	24.37	63.9/ 5.4	GIVDSEDLPLNISR / KAVENSPFLER / TNNTLTIVDSGIGMTK / DGQSDIYYITGESK / RAPFDLFDTR / ADLVNNLGTIAR / SGDEMTSLKDYVTR / EDQLEYLEER / IRFESLTDK / EVSHEWSLVNK / AVENSPFLER / MKDGQSDIYYITGESK / EGLKLEESEDEK (3.48 / 3.17 / 3.16 / 3.03 / 2.94 / 2.81 / 2.81 / 2.6 / 2.56 / 2.51 / 2.49 / 2.15 / 2.01)
34	Heat shock protein 90.1	145.47	20.88	83.7/ 5.05	KEEEGDVEDIDEEKEK / SGDELTSLKDYVTR / ELISNSSDALDKIR / GVVDSDDLPLNISR / ADLVNNLGTIAR / KAVENSPFLEK / TLSIIDSGIGMTK / EGLKLDDETEEEK / KEEEGDVEDIDEEK / RAPFDLFDTR / ELISNSSDALDK / EDQLEYLEER / EEEGDVEDIDEEK / KPEEITKEEYAAFYK / LDSQPELFIR (3.71 / 3.28 / 3.17 / 3.15 / 2.94 / 2.92 / 2.84 / 2.68 / 2.67 / 2.61 / 2.59 / 2.5 / 2.36 / 2.31 / 2.25)
35	Heat shock protein 90.1	112.75	23.08	83.7/ 5.05	GVVDSDDLPLNISR / SGDELTSLKDYVTR / ADLVNNLGTIAR / RAPFDLFDTR / KPEEITKEEYAAFYK / ELISNSSDALDKIR / TLSIIDSGIGMTK / KEEEGDVEDIDEEKEK / KAVENSPFLEK / EDQLEYLEER / ELISNSSDALDK / EGLKLDDETEEEK / LDSQPELFIR / DAEGEPLGR / APFDLFDTR / IRFESLTDK (3.21 / 3.17 / 3.04 / 2.99 / 2.93 / 2.91 / 2.75 / 2.74 / 2.63 / 2.53 / 2.5 / 2.46 / 2.31 / 2.11 / 2.02 / 2.01)
36	Chaperonin-60alpha	147.71	19.87	63.4/ 5.4	KELAETDSVYDSEK / TNDSAGDGTTTASVLAR / VGAATETELEDR / LADAVALTLGPR / VGAATETELEDRK / LGLLSVTSGANPVSVK / YENLVEAGVIDPAK / ELAETDSVYDSEK / GYISPQFVTNPEK / NVVLDEYGTPK / DKLEDAEER (4.7 / 4.28 / 3.7 / 3.49 / 3.34 / 3.05 / 2.95 / 2.9 / 2.77 / 2.35 / 2.08)
59	Triosephosphate isomerase	51.4	29.39	24.6 / 5.66	VASPAQAQEVHSELR / VASPAQAQEVHSELRK / ESGSTLEVVAAQTK / ALLGESNEFVGDK / IIYGGSVNGANSK / VAYALSQGLK / RALLGESNEFVGDK (4.76 / 4.25 / 3.58 / 2.94 / 2.93 / 2.82 / 2.79)
104	UDP-glucose pyrophosphorylase 1	65.59	36.8	52.7/ 6.48	ANPANPSIDLGPEFK / IQTPTDEVVVPYDILAPVPEDPAETKK / VLQLETAAGAAIK / SIPSIVELDSLK / IQTPTDEVVVPYDILAPVPEDPAETK / VQLLEIAQVPDEHVNEFK / IEIHTFNQSQFPR / LVIEDFLPLPSK / EYVFIANSDNLGAIVDLR / LEIPDGAVLQDK / IFNTNNLWANLSAIK / ASSDLLLVQSDLYTLSDGLVTR (3.4 / 2.97 / 2.9 / 2.81 / 2.67 / 2.45 / 2.39 / 2.36 / 2.25 / 2.17 / 2.07 / 2.03)
